# Supplementary material for: Selection of internal references for RT-qPCR assays in Neurofibromatosis type 1 (NF1) related Schwann cell lines
Source: PubMed Central journal article supplement (PMC7906369; doi:10.1371/journal.pone.0241821), 2021-02-25
Supplement: pone.0241821.s005.pdf [file pone.0241821.s005.pdf]

S3 Table. Primer list

| Gene symbol | Order NO. | Amplicon length (bp) | Position | NCBI Accession No. | Full name                                |
|-------------|-----------|----------------------|----------|--------------------|------------------------------------------|
| Rps18       | B661101   | 106                  | exon2/3  | NM_022551          | 18S Ribosomal RNA                        |
| ACTB        | B661102   | 144                  | exon5/6  | NM_001101          | $\beta$ -actin                           |
| B2M         | B661103   | 114                  | exon2/3  | NM_004048          | $\beta$ -2-microglobulin                 |
| GAPDH       | B661104   | 138                  | Exton6/7 | NM_002046          | Glyceraldehyde-3-phosphate dehydrogenase |
| PPIA        | B661105   | 97                   | exon1/3  | NM_021130          | Peptidylprolyl isomerase A               |
| HPRT1       | B661106   | 131                  | exon1/2  | NM_000194          | Hypoxanthine phosphoribosyltransferase 1 |
| TBP         | B661108   | 132                  | exon5/6  | NM_003194          | TATA binding protein                     |
| UBC         | B661109   | 123                  | exon1/2  | NM_021009          | Ubiquitin C                              |
| RPLP0       | B661110   | 101                  | exon2/3  | NM_001002          | Ribosomal protein large P0               |
| TFRC        | B661111   | 156                  | exon2/3  | NM_003234          | Transferrin receptor (p90, CD71)         |
| RPL32       | B661112   | 100                  | exon3/4  | NM_000994          | Ribosomal protein L32                    |

\* All the primers were commercial products validated by Sangon Biotech (Shanghai, China)
