# Supplementary material for: Selection of internal references for RT-qPCR assays in Neurofibromatosis type 1 (NF1) related Schwann cell lines
Source: PLoS One. 2021 Feb 25;16(2):e0241821. doi: 10.1371/journal.pone.0241821 (PMC7906369; doi:10.1371/journal.pone.0241821)
Supplement: S1 Checklist — (XLS) [file pone.0241821.s001.xls]

## Sheet: Sheet1
ITEM TO CHECK	IMPORTANCE	CHECKLIST
EXPERIMENTAL DESIGN
Definition of experimental and control groups	E	mentioned in the manuscript "method" section
Number within each group	E	mentioned in the manuscript "method" section
Assay carried out by core lab or investigator's lab?	D	core lab
Acknowledgement of authors' contributions	D	mentioned in the attachment files
SAMPLE
Description	E	mentioned in the manuscript
Volume/mass of sample processed	D	cell line sample
Microdissection or macrodissection	E	cell line sample
Processing procedure	E	all the cDNA samples were collected from cell line samples and were diluted to 20ng/ml. the real time pcr tests were performed immediately after those samples were reverse transcripted into cDNA.
If frozen - how and how quickly?	E	all the operation was performed on ice.
If fixed - with what, how quickly?	E	N/A
Sample storage conditions and duration (especially for FFPE samples)	E	all the samples were storaged at -20°C.
NUCLEIC ACID EXTRACTION
Procedure and/or instrumentation	E	mentioned in the manuscript "method" section
Name of kit and details of any modifications	E	PrimeScriptTM RT Master Mix kit (TaKaRa RR036A)
Source of additional reagents used	D	N/A
Details of DNase or RNAse treatment	E	all the reagents, EP tubes, pipette tips and other materials were Dnase- and RNAse- free.
Contamination assessment (DNA or RNA)	E	mentioned in the manuscript "method" section
Nucleic acid quantification	E	mentioned in the manuscript
Instrument and method	E	NanoDrop 2000 Spectrophotometer (Thermo Scientific, Waltham, MA, USA)
Purity (A260/A280)	D	mentioned in the manuscript
Yield	D	mentioned in the manuscript
RNA integrity method/instrument	E	mentioned in the manuscript
RIN/RQI or Cq of 3' and 5' transcripts	E	mentioned in the manuscript
Electrophoresis traces	D	N/A
Inhibition testing (Cq dilutions, spike or other)	E	mentioned in the manuscript
REVERSE TRANSCRIPTION
Complete reaction conditions	E	mentioned in the manuscript
Amount of RNA and reaction volume	E	it was a20μL reaction system containing 4μL takara RT Master MIX and 16μL RNA aqueous solution.
Priming oligonucleotide (if using GSP) and concentration	E	PrimeScriptTM RT Master Mix kit (TaKaRa RR036A)
Reverse transcriptase and concentration	E	PrimeScriptTM RT Master Mix kit (TaKaRa RR036A)
Temperature and time	E	PrimeScriptTM RT Master Mix kit (TaKaRa RR036A)
Manufacturer of reagents and catalogue numbers	D	PrimeScriptTM RT Master Mix kit (TaKaRa RR036A)
Cqs with and without RT	D*
Storage conditions of cDNA	D	all the samples were storaged at -20°C.
qPCR TARGET INFORMATION
If multiplex, efficiency and LOD of each assay.	E	commercial primers provided by Sangon Biotech
Sequence accession number	E	commercial primers provided by Sangon Biotech
Location of amplicon	D	commercial primers provided by Sangon Biotech
Amplicon length	E	commercial primers provided by Sangon Biotech
In silico specificity screen (BLAST, etc)	E	commercial primers provided by Sangon Biotech
Pseudogenes, retropseudogenes or other homologs?	D	commercial primers provided by Sangon Biotech
Sequence alignment	D	commercial primers provided by Sangon Biotech
Secondary structure analysis of amplicon	D	commercial primers provided by Sangon Biotech
Location of each primer by exon or intron (if applicable)	E	commercial primers provided by Sangon Biotech
What splice variants are targeted?	E	commercial primers provided by Sangon Biotech
qPCR OLIGONUCLEOTIDES
Primer sequences	E	commercial primers provided by Sangon Biotech
RTPrimerDB Identification Number	D	commercial primers provided by Sangon Biotech
Probe sequences	D**	commercial primers provided by Sangon Biotech
Location and identity of any modifications	E	commercial primers provided by Sangon Biotech
Manufacturer of oligonucleotides	D	commercial primers provided by Sangon Biotech
Purification method	D	commercial primers provided by Sangon Biotech
qPCR PROTOCOL
Complete reaction conditions	E
Reaction volume and amount of cDNA/DNA	E	1μL cDNA (20ng/mL) in a 10μL reaction system.
Primer, (probe), Mg++ and dNTP concentrations	E	the concentraction of primers was 10mM
Polymerase identity and concentration	E	TB Green® Premix Ex Taq™ Kit (TaKaRa RR420A)
Buffer/kit identity and manufacturer	E	TB Green® Premix Ex Taq™ Kit (TaKaRa RR420A)
Exact chemical constitution of the buffer	D	TB Green® Premix Ex Taq™ Kit (TaKaRa RR420A)
Additives (SYBR Green I, DMSO, etc.)	E	TB Green® Premix Ex Taq™ Kit (TaKaRa RR420A)
Manufacturer of plates/tubes and catalog number	D	mentioned in the manuscript
Complete thermocycling parameters	E	mentioned in the manuscript
Reaction setup (manual/robotic)	D	robotic
Manufacturer of qPCR instrument	E	Biosystems 7500 Real-Time PCR System
qPCR VALIDATION
Evidence of optimisation (from gradients)	D	mentioned in the attachment files
Specificity (gel, sequence, melt, or digest)	E	mentioned in the attachment files
For SYBR Green I, Cq of the NTC	E	mentioned in the attachment files
Standard curves with slope and y-intercept	E	mentioned in the attachment files
PCR efficiency calculated from slope	E	mentioned in the attachment files
Confidence interval for PCR efficiency or standard error	D	mentioned in the attachment files
r2 of standard curve	E	mentioned in the attachment files
Linear dynamic range	E	mentioned in the attachment files
Cq variation at lower limit	E	mentioned in the attachment files
Confidence intervals throughout range	D	mentioned in the attachment files
Evidence for limit of detection	E	mentioned in the attachment files
If multiplex, efficiency and LOD of each assay.	E	N/A
DATA ANALYSIS
qPCR analysis program (source, version)	E	mentioned in the manuscript "method" section
Cq method determination	E	mentioned in the manuscript "method" section
Outlier identification and disposition	E	mentioned in the manuscript "method" section
Results of NTCs	E	mentioned in the manuscript "method" section
Justification of number and choice of reference genes	E	mentioned in the manuscript "method" section
Description of normalisation method	E	mentioned in the manuscript "method" section
Number and concordance of biological replicates	D	mentioned in the manuscript "method" section
Number and stage (RT or qPCR) of technical replicates	E	mentioned in the manuscript "method" section
Repeatability (intra-assay variation)	E	mentioned in the manuscript "method" section
Reproducibility (inter-assay variation, %CV)	D	mentioned in the manuscript "method" section
Power analysis	D	mentioned in the manuscript "method" section
Statistical methods for result significance	E	mentioned in the manuscript "method" section
Software (source, version)	E	mentioned in the manuscript "method" section
Cq or raw data submission using RDML	D	mentioned in the manuscript "method" section
Table 1. MIQE checklist for authors, reviewers and editors. All essential information (E) must be submitted with the manuscript. Desirable
information (D) should be submitted if available. If using primers obtained from RTPrimerDB, information on qPCR target, oligonucleotides,
protocols and validation is available from that source.
*: Assessing the absence of DNA using a no RT assay is essential when first extracting RNA. Once the sample has been validated as
RDNA-free, inclusion of a no-RT control is desirable, but no longer essential.
**: Disclosure of the probe sequence is highly desirable and strongly encouraged. However, since not all commercial pre-designed assay
vendors provide this information, it cannot be an essential requirement. Use of such assays is advised against.
